# Supplementary material for: Biofilm Eradication Using Biogenic Silver Nanoparticles
Source: PubMed Central journal article supplement (PMC7249070; doi:10.3390/molecules25092023), 2020-04-26
Supplement: molecules-25-02023-s001.pdf [file molecules-25-02023-s001.pdf]

# Supplementary Materials

## Biofilm Eradication Using Biogenic Silver Nanoparticles

**María Belén Estevez**<sup>1</sup>, **Sofía Raffaelli**<sup>1</sup>, **Scott G. Mitchell**<sup>2,3,\*</sup>, **Ricardo Faccio**<sup>4</sup> and **Silvana Alborés**<sup>1,\*</sup>

<sup>1</sup> Área de Microbiología, Departamento de Biociencias, Facultad de Química, Universidad de la República, 11800 Montevideo, Uruguay; bestevez@fq.edu.uy (M.B.E.); sraffaelli@fq.edu.uy (S.R.)

<sup>2</sup> Instituto de Ciencia de Materiales de Aragón (ICMA), Consejo Superior de Investigaciones Científicas (CSIC)-Universidad de Zaragoza, 50009 Zaragoza, Spain

<sup>3</sup> CIBER-BBN, Instituto de Salud Carlos III, 28029 Madrid, Spain

<sup>4</sup> Centro NanoMat & Grupo Física, Departamento de Experimentación y Teoría de la Estructura de la Materia y sus Aplicaciones (DETEMA), Facultad de Química, Universidad de la República, 11800 Montevideo, Uruguay; rfaccio@fq.edu.uy

\* Correspondence: scott@unizar.es (S.G.M.); salbores@fq.edu.uy (S.A.)

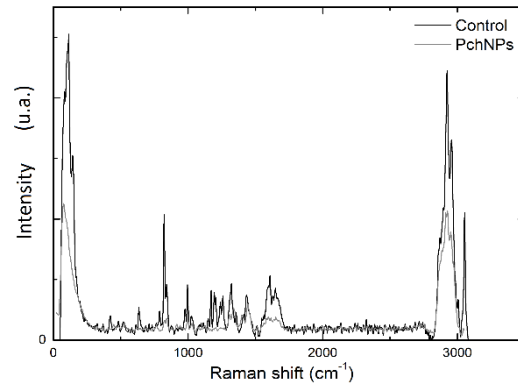

**Figure S1.** Raman spectra for *E. coli* cells, control and treated cells with PchNPs.

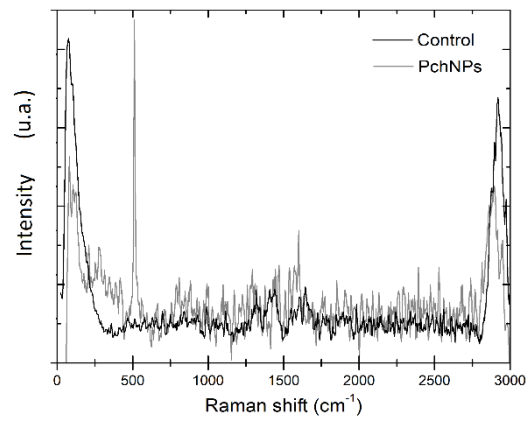

**Figure S2.** Raman spectra for *C. albicans* cells, control and treated cells with PchNPs.
